# Supplementary material for: Experience with crossmodal statistics reduces the sensitivity for audio-visual temporal asynchrony
Source: PubMed Central journal article supplement (PMC5431144; doi:10.1038/s41598-017-01252-y), 2017-05-03
Supplement: 41598_2017_1252_MOESM1_ESM.pdf [file 41598_2017_1252_MOESM1_ESM.pdf]

## **Supplementary Information**

“Experience with crossmodal statistics reduces the sensitivity for audio-visual temporal asynchrony”

Boukje Habets, Patrick Bruns & Brigitte Röder

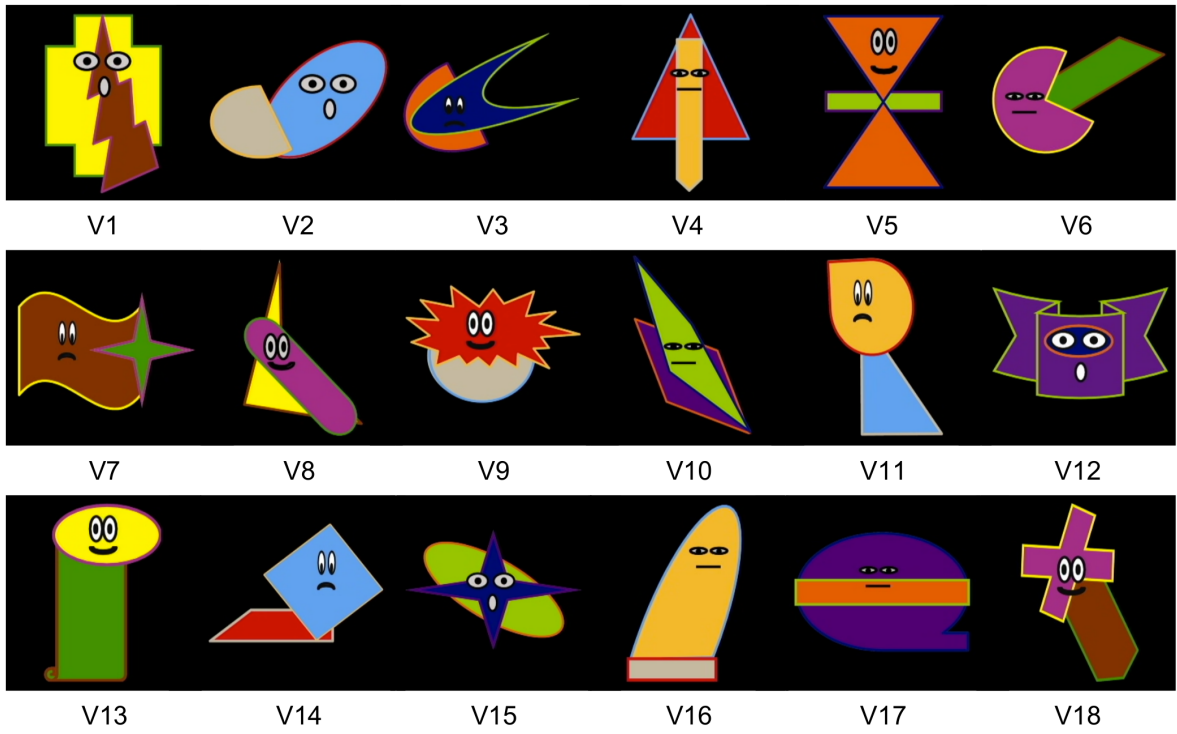

**Figure S1.** Visual stimuli (see also Supplementary Table S1).

**Table S1.** Conditions and stimuli.

| Condition  | Stimulus | Alignment  | Color | Face      | Direction | Way        | Audio      |
|------------|----------|------------|-------|-----------|-----------|------------|------------|
| <b>L</b>   | A1V1     | Vertical   | 1     | Surprised | Left      | Continuous | “video”    |
|            | A2V2     | Horizontal | 2     | Surprised | Left      | 2 steps    | “musicbox” |
|            | A3V3     | Horizontal | 3     | Sad       | Right     | 1 step     | “icecubes” |
|            | A4V4     | Vertical   | 2     | Neutral   | Down      | 1 step     | “cork”     |
|            | A5V5     | Vertical   | 3     | Smiling   | Up        | 2 steps    | “motorsaw” |
|            | A6V6     | Horizontal | 1     | Neutral   | Down      | Vibrating  | “teeth”    |
| <b>NC</b>  | A6V1     | Vertical   | 1     | Surprised | Left      | Continuous | “teeth”    |
|            | A5V2     | Horizontal | 2     | Surprised | Left      | 2 steps    | “motorsaw” |
|            | A4V3     | Horizontal | 3     | Sad       | Right     | 1 step     | “cork”     |
|            | A3V4     | Vertical   | 2     | Neutral   | Down      | 1 step     | “icecubes” |
|            | A2V5     | Vertical   | 3     | Smiling   | Up        | 2 steps    | “musicbox” |
|            | A1V6     | Horizontal | 1     | Neutral   | Down      | Vibrating  | “video”    |
| <b>V_l</b> | A13V1    | Vertical   | 1     | Surprised | Left      | Continuous | “tone”     |
|            | A14V2    | Horizontal | 2     | Surprised | Left      | 2 steps    | “handsaw”  |
|            | A15V3    | Horizontal | 3     | Sad       | Right     | 1 step     | “rooster”  |
|            | A16V4    | Vertical   | 2     | Neutral   | Down      | 1 step     | “trumpet”  |
|            | A17V5    | Vertical   | 3     | Smiling   | Up        | 2 steps    | “cuckoo”   |
|            | A18V6    | Horizontal | 1     | Neutral   | Down      | Vibrating  | “water”    |
| <b>A_l</b> | A1V13    | Vertical   | 1     | Smiling   | Left      | Continuous | “video”    |
|            | A2V14    | Horizontal | 2     | Sad       | Left      | 2 steps    | “musicbox” |
|            | A3V15    | Horizontal | 3     | Surprised | Right     | 1 step     | “icecubes” |
|            | A4V16    | Vertical   | 2     | Neutral   | Down      | 1 step     | “cork”     |
|            | A5V17    | Horizontal | 3     | Neutral   | Up        | 2 steps    | “motorsaw” |
|            | A6V18    | Vertical   | 1     | Smiling   | Down      | Vibrating  | “teeth”    |
| <b>N</b>   | A7V7     | Horizontal | 1     | Sad       | Right     | 2 steps    | “morse”    |
|            | A8V8     | Vertical   | 1     | Smiling   | Up        | 1 step     | “computer” |
|            | A9V9     | Horizontal | 2     | Smiling   | Up        | Continuous | “flute”    |
|            | A10V10   | Vertical   | 3     | Neutral   | Down      | Continuous | “bagpipe”  |
|            | A11V11   | Vertical   | 2     | Sad       | Right     | Vibrating  | “car”      |
|            | A12V12   | Horizontal | 3     | Surprised | Left      | Vibrating  | “violin”   |

*Note.* L = audio-visual learned; NC = audio-visual newly combined; V-l = audio-visual visual\_learned; A-l = audio-visual auditory\_learned; N = audio-visual new.

**Table S2.** Mean proportion of simultaneity judgments per condition and SOA (with SEMs).

| SOA  | L           | NC          | V-l         | A-l         | N           |
|------|-------------|-------------|-------------|-------------|-------------|
| -400 | 0.09 (0.04) | 0.10 (0.03) | 0.08 (0.05) | 0.09 (0.05) | 0.04 (0.03) |
| -300 | 0.27 (0.08) | 0.18 (0.05) | 0.17 (0.07) | 0.21 (0.05) | 0.16 (0.06) |
| -200 | 0.45 (0.09) | 0.53 (0.08) | 0.37 (0.09) | 0.47 (0.09) | 0.34 (0.06) |
| -100 | 0.83 (0.06) | 0.75 (0.06) | 0.65 (0.08) | 0.63 (0.09) | 0.58 (0.07) |
| 0    | 0.91 (0.03) | 0.87 (0.04) | 0.83 (0.04) | 0.80 (0.05) | 0.80 (0.05) |
| 100  | 0.98 (0.02) | 0.91 (0.04) | 0.91 (0.04) | 0.86 (0.04) | 0.81 (0.07) |
| 200  | 0.93 (0.05) | 0.88 (0.04) | 0.88 (0.04) | 0.86 (0.03) | 0.88 (0.04) |
| 300  | 0.85 (0.06) | 0.71 (0.07) | 0.69 (0.08) | 0.67 (0.07) | 0.64 (0.07) |
| 400  | 0.38 (0.09) | 0.31 (0.09) | 0.36 (0.08) | 0.27 (0.08) | 0.28 (0.08) |

*Note.* SOA = stimulus onset asynchrony (negative values = auditory stimulus first, positive values = visual stimulus first); L = audio-visual learned; NC = audio-visual newly combined; V-l = audio-visual visual\_learned; A-l = audio-visual auditory\_learned; N = audio-visual new.
